# Supplementary material
Source: PubMed Central journal article supplement (PMC2709069)

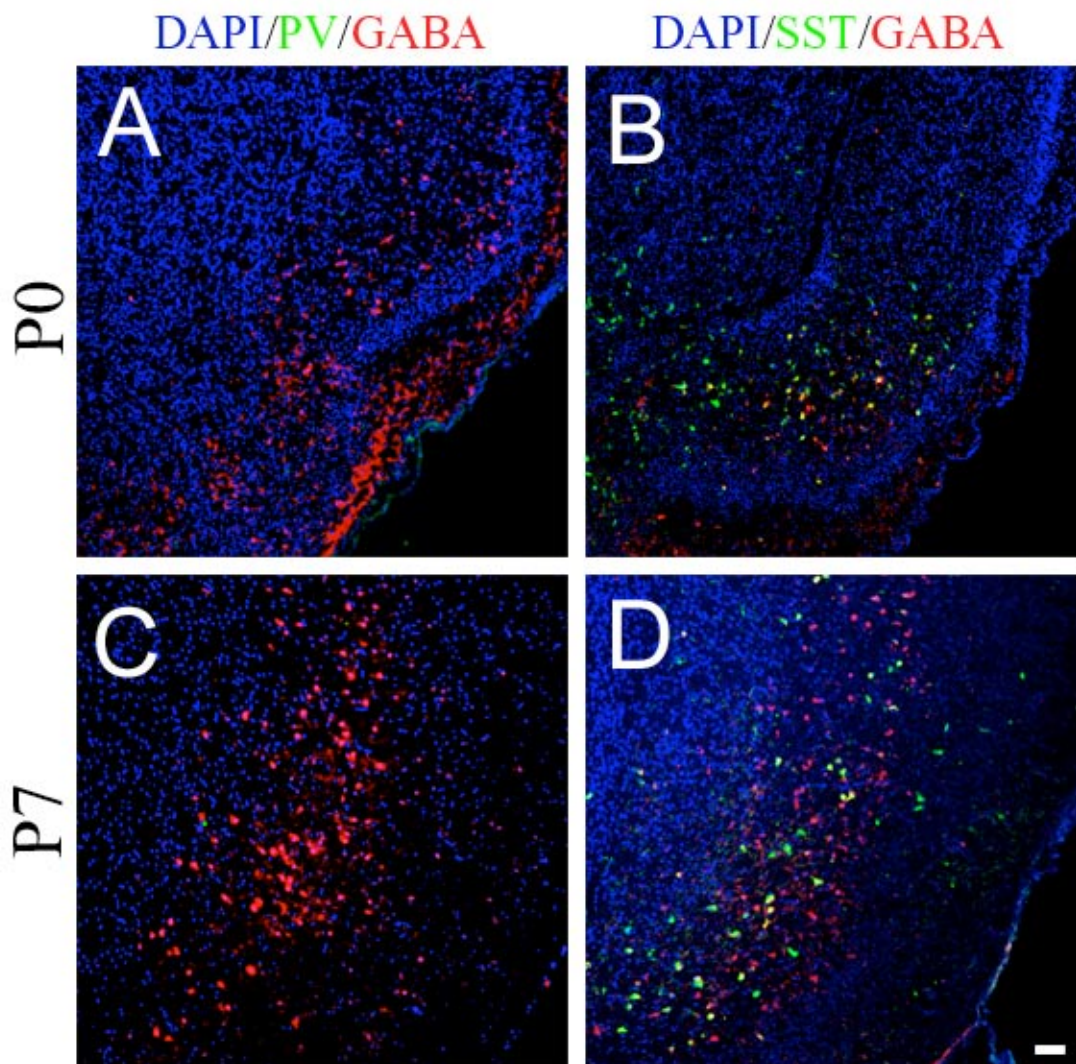

Supplement: supp_136_15_2633__1.pdf [file supp_136_15_2633__1.pdf]

*Olig1<sup>cre/+</sup>*

*R1a<sup>fx/+</sup>;R1b<sup>+/-</sup>*

*R1a<sup>fx/-</sup>;R1b<sup>-/-</sup>*

DAPI/GABA

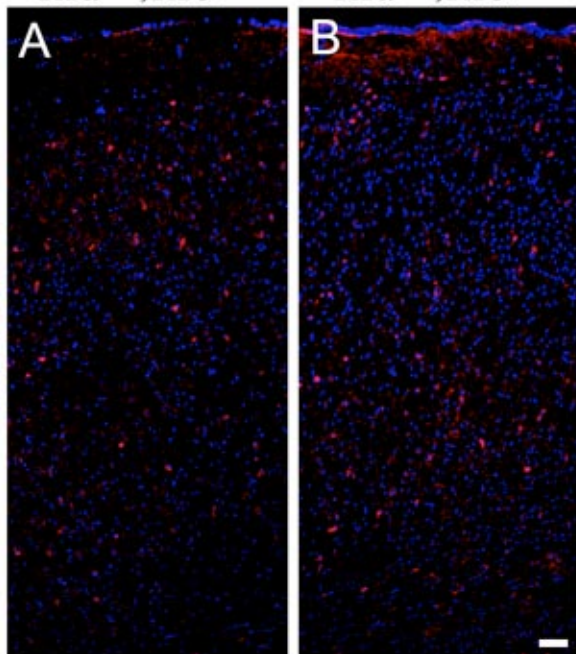

Supplement: supp_136_15_2633__8.pdf [file supp_136_15_2633__8.pdf]
